# Supplementary material for: Development of a chemiluminescence immunoassay for detection of tenuazonic acid mycotoxin in fruit juices with a specific camel polyclonal antibody
Source: Royal Society of Chemistry journal article supplement (doi:10.1039/d1ay00200g), 2021-01-01
Supplement: d1ay00200g1.pdf [file d1ay00200g1.pdf]

1 **Supporting Information**

2

3 **Development of Chemiluminescent Immunoassay for Detection of Tenuazonic Acid**  
4 **Mycotoxin in Fruit Juices with Specific Camel Polyclonal Antibody**

5

6 Feng Wang,<sup>1</sup> De-Bin Wan,<sup>2</sup> Yu-Dong Shen,<sup>1</sup> Yuan-Xin Tian,<sup>3</sup> Zhi-Li Xiao,<sup>1</sup> Zhen-Lin  
7 Xu,<sup>1</sup> Jin-Yi Yang,<sup>1,\*</sup> Yuan-Ming Sun,<sup>1</sup> Bruce D. Hammock,<sup>2</sup> and Hong Wang<sup>1,\*</sup>

8

9 <sup>1</sup> College of Food Science, South China Agricultural University, Guangdong  
10 Provincial Key Laboratory of Food Quality and Safety, Guangzhou 510642, P. R.  
11 China

12 <sup>2</sup> Department of Entomology and Nematology and UCD Comprehensive Cancer  
13 Center, University of California, Davis, California 95616, United States

14 <sup>3</sup> School of Pharmaceutical Sciences, Southern Medical University, Guangzhou  
15 510515, P. R. China

16

17 \* Correspondence: yjy361@163.com (J.Y.Y.); gzwhongd@163.com (H.W.)

19

20 **Table of Contents**

21

22 Figure S1 ESI-MS analysis of the TeA-CMO hapten

23 Figure S2 Characterization of hapten-carrier protein conjugates (a) TeA-CMO-KLH and

24 (b) TeA-CMO-OVA by UV-Vis spectra

25 Figure S3 Optimization of various factors on the sensitivity of icCLEIA. (a) Different

26 combinations of concentrations of coating antigen and polyclonal antibody; (b)

27 Different concentrations of HRP-goat anti-llama IgG; (c) The antibody dilution buffers

28 of PB, PBS, PBST, and Tris-HCl; (d) The pH of antibody dilution buffers with 6.5, 7.0,

29 7.4, 8.0, and 8.5; (e) TeA dilution buffer of H<sub>2</sub>O, PBS, and PBST (n=3)

30

31 Table S1 Ion source parameters of LC-MS/MS.

32 Table S2 Q1 MI method parameters of LC-MS/MS.

33 Table S3 MRM method parameters of LC-MS/MS.

1607B0143-2 #12-16 RT: 0.11-0.15 AV: 3 SB: 6 0.02-0.05\_0.30-0.37 NL: 3.64E7  
F: -c ESI Q1MS [100.000-1000.000]

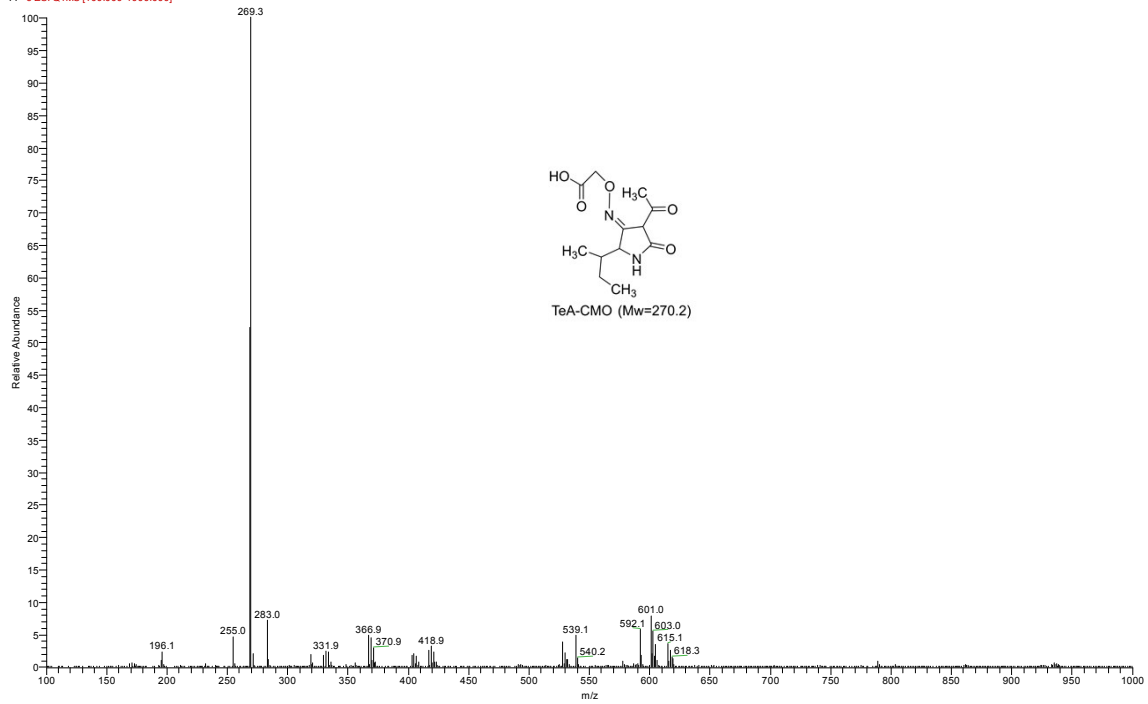

35

36

Figure S1

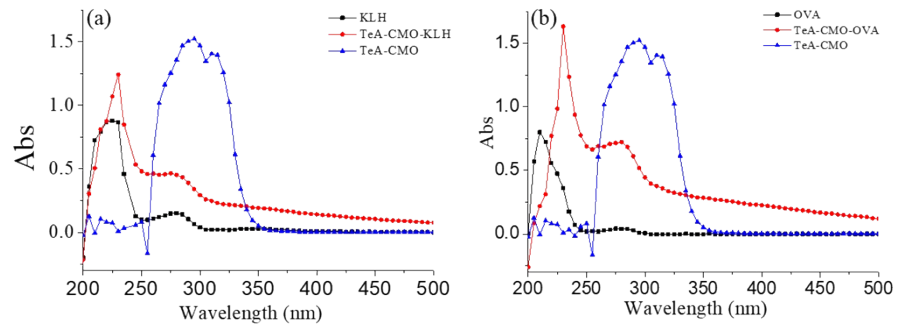

37

38

Figure S2

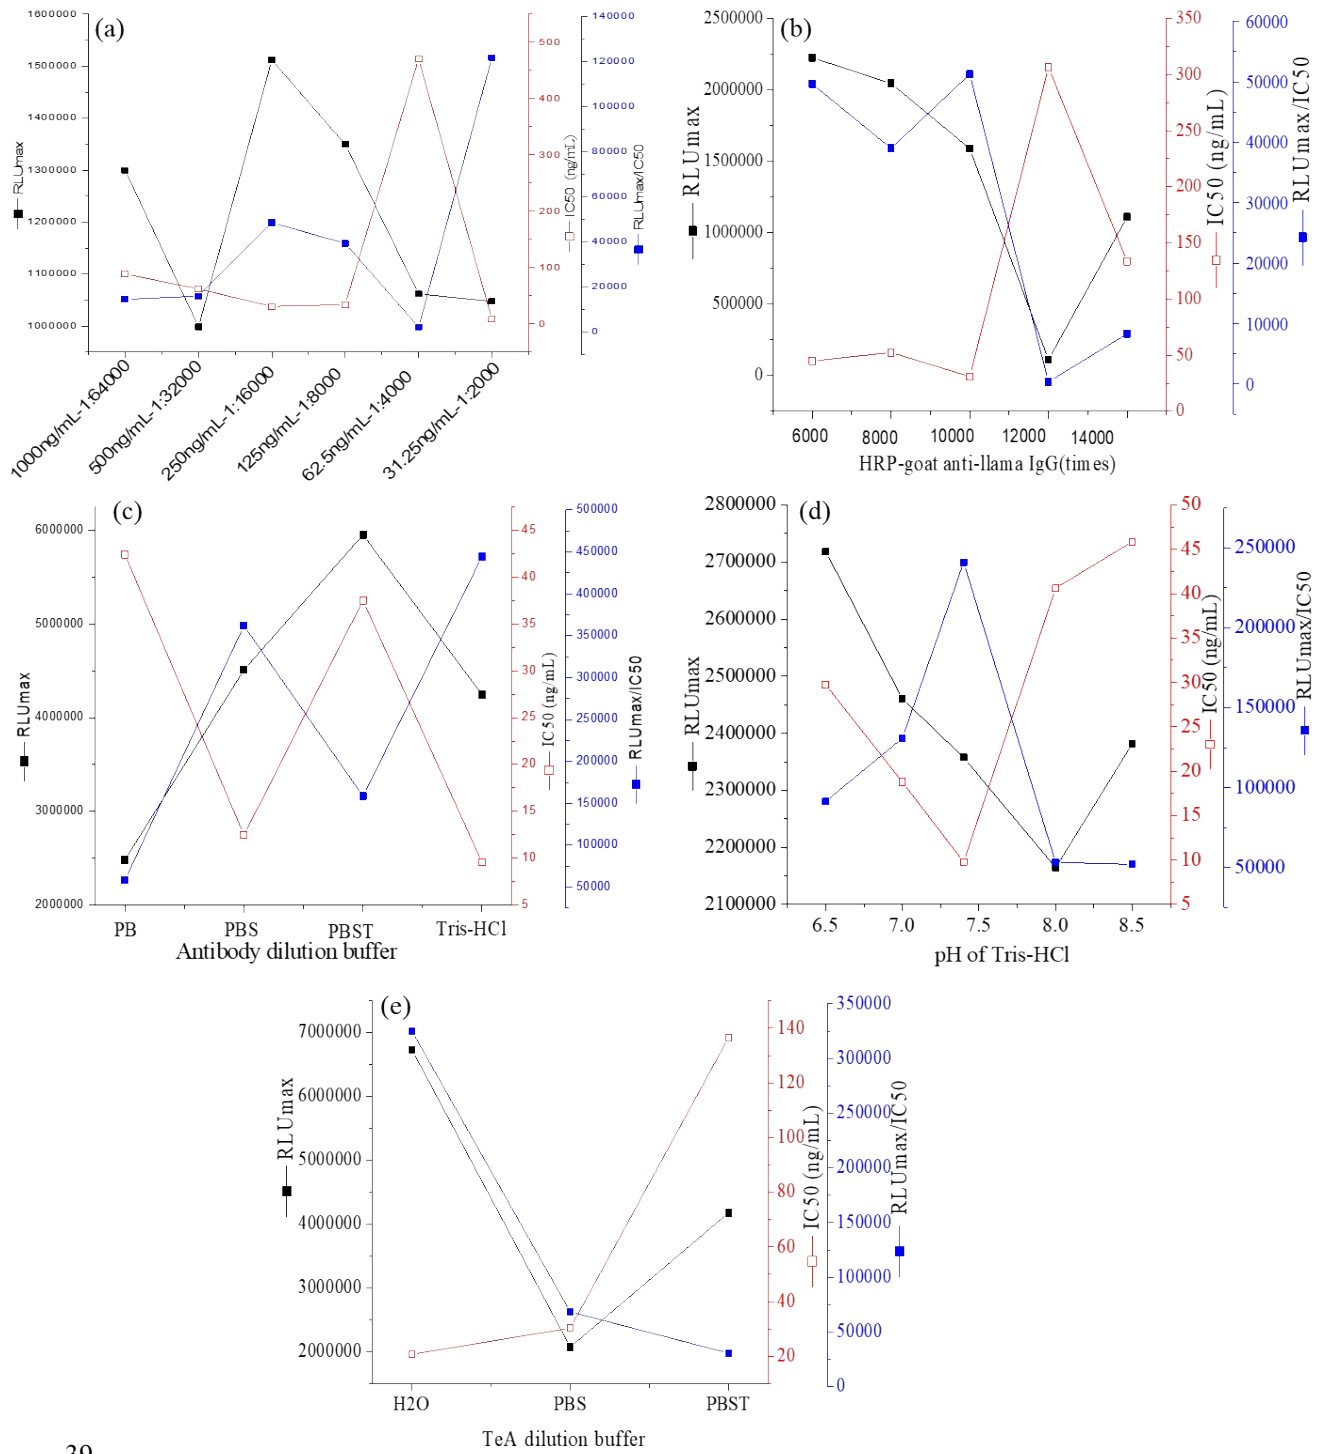

39

40

Figure S3

42

Table S1 Ion source parameters of LC-MS/MS

| Acquisition Parameters | ESI, negative |
|------------------------|---------------|
| CUR:                   | 30            |
| TEM:                   | 600           |
| GS1:                   | 50            |
| GS2:                   | 60            |
| iHe:                   | ON            |
| CAD:                   | Medium        |
| IS:                    | -4500         |
| EP:                    | -10           |

43

44

Table S2 Q1 MI method parameters of LC-MS/MS

| Compounds | Q1    | Dwell (msec) | DP (V) |
|-----------|-------|--------------|--------|
| TeA       | 195.9 | 50           | -105   |
| TeA-d13   | 209.2 | 50           | -105   |

45

46

Table S3 MRM method parameters of LC-MS/MS

| Compounds | Q1    | Q3    | Dwell (msec) | DP (V) | CE (V) | CXP (V) |
|-----------|-------|-------|--------------|--------|--------|---------|
| TeA       | 195.9 | 138.7 | 30           | -75    | -22    | -5      |
|           |       | 112.1 | 30           | -75    | -26    | -5      |
| TeA-d13   | 209.1 | 143.2 | 30           | -80    | -22    | -5      |
|           |       | 114.6 | 30           | -80    | -26    | -5      |

47
